# LIF-Free Embryonic Stem Cell Culture in Simulated Microgravity

Yumi Kawahara<sup>1,2</sup>, Tomotaka Manabe<sup>3</sup>, Masaya Matsumoto<sup>3</sup>, Teruyuki Kajiume<sup>4</sup>, Masayasu Matsumoto<sup>1</sup>, Louis Yuge<sup>2,3\*</sup>

**1** Department of Clinical Neuroscience and Therapeutics, Graduate School of Biomedical Sciences, Hiroshima University, Minami-ku, Hiroshima, Japan, **2** Space-Bio Laboratories Y. K., Hiroshima University, Minami-ku, Hiroshima, Japan, **3** Division of Bio-Environmental Adaptation Sciences, Graduate School of Health Sciences, Hiroshima University, Minami-ku, Hiroshima, Japan, **4** Department of Pediatrics, Graduate School of Biomedical Sciences, Hiroshima University, Minami-ku, Hiroshima, Japan

## Abstract

**Background:** Leukemia inhibitory factor (LIF) is an indispensable factor for maintaining mouse embryonic stem (ES) cell pluripotency. A feeder layer and serum are also needed to maintain an undifferentiated state, however, such animal derived materials need to be eliminated for clinical applications. Therefore, a more reliable ES cell culture technique is required.

**Methodology/Principal Findings:** We cultured mouse ES cells in simulated microgravity using a 3D-clinostat. We used feeder-free and serum-free media without LIF.

**Conclusions/Significance:** Here we show that simulated microgravity allows novel LIF-free and animal derived material-free culture methods for mouse ES cells.

**Citation:** Kawahara Y, Manabe T, Matsumoto M, Kajiume T, Matsumoto M, et al. (2009) LIF-Free Embryonic Stem Cell Culture in Simulated Microgravity. PLoS ONE 4(7): e6343. doi:10.1371/journal.pone.0006343

**Editor:** Thomas Zwaka, Baylor College of Medicine, United States of America

**Received:** April 15, 2009; **Accepted:** June 18, 2009; **Published:** July 23, 2009

**Copyright:** © 2009 Kawahara et al. This is an open-access article distributed under the terms of the Creative Commons Attribution License, which permits unrestricted use, distribution, and reproduction in any medium, provided the original author and source are credited.

**Funding:** The authors have no support or funding to report.

**Competing Interests:** Louis Yuge and MITSUBISHI HEAVY INDUSTRIES, LTD.(MHI) have a patent application on the 3D-clinostat, Japanese patent (publication number P2001-197182A, date of filing June 28, 2001, and overseas patents, WO2004/061092 A1 PCT, 2004). This has no influence on the content of this article. Our laboratory has a research agreement with MHI.

\* E-mail: ryuge@hiroshima-u.ac.jp

## Introduction

ES cells readily proliferate and differentiate but also undergo unexpected spontaneous differentiation. Mouse ES cells are typically maintained on a feeder layer of mouse embryonic fibroblasts (MEFs). Recently, MEF-conditioned media was shown to support the proliferation of mouse ES cells, eliminating the need of a feeder layer. It was subsequently demonstrated that MEFs inhibit ES cell differentiation by producing the IL-6 family cytokine, LIF [1]. Adding recombinant LIF to mouse ES cell culture medium removes the need for MEF.

We are currently culturing cells in a microgravity environment to determine their cellular responses to physical stimulation. Previous studies have shown that microgravity suppresses the differentiation of human osteoblast cells [2], human hematopoietic progenitor cells [3], and rat myoblasts [4]. Yuge *et al.* [5] showed that human mesenchymal stem cells cultured under simulated microgravity maintained their undifferentiated state. When these cells were transplanted into cartilage defective mice, they differentiated into hyaline cartilage and also had a high survival rate. Indeed, some studies have indicated that microgravity suppresses cellular differentiation thereby providing a potentially effective means to maintain stem cell characteristics.

We found that mouse ES cells could be maintained in feeder-free and serum-free culture conditions without LIF in simulated microgravity using the 3D-clinostat.

## Results

Group 1G cells (ES cells in normal 1G environment) were morphologically different from general ES cells. They included forms similar to those of differentiated cells (Fig. 1a,b). On the other hand, group CL cells (ES cells in simulated microgravity environment) formed many small spheres after three days of culture (Fig. 1c). These floating spheres grew bigger during the culture period (Fig. 1d). After seven days of culture, the number of cells in group CL was about eight-times the number for group 1G. We tested these spheres to determine if they were indeed ES cells, and not embryonic body cells. Alkaline phosphatase (ALP) staining results indicated that the mouse ES cells had grown in group CL without the usual support of LIF or the serum and feeder layer and were maintained in an undifferentiated state (Fig. 2a,b). After three days of culture, *Sox2* expression decreased in the cells of group 1G and *Oct-4* and *Nanog* expressions decreased by Day 7 (Fig. 2c). Sphere-forming cells in group CL, however, maintained the expression of these undifferentiated markers. Moreover, we confirmed the pluripotency of cells cultured under simulated microgravity for seven days. Teratomas were only generated by subcutaneously injecting group CL cells into C57BL/6 mice. The teratoma contains a mixture of mature and immature elements derived from the ectoderm, endoderm and mesoderm in a haphazard distribution (Fig. 3).

## Discussion

Prolonged exposure of humans and animals to microgravity results in several well characterized physiological changes, including space

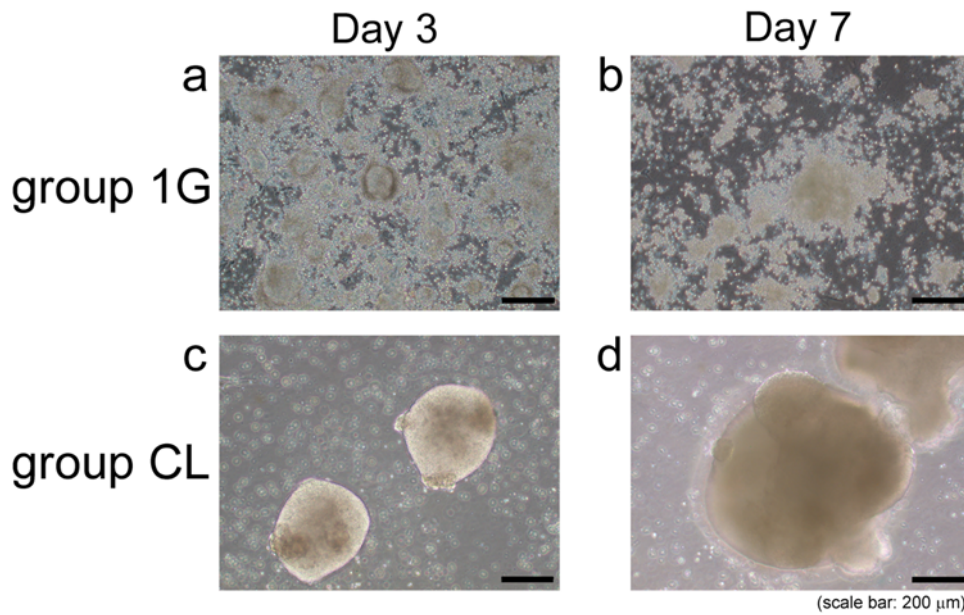

**Figure 1. Morphological changes of cultured mouse ES cells on Day 3 and 7.** All the cells became oval cell shapes and flattened, the phenotype of differentiated ES cells in group 1G (a, b). The cells of group CL showed the formation of cell spheres (c, d). doi:10.1371/journal.pone.0006343.g001

flight-induced bone loss, anemia and immunosuppression. Data from astronaut studies and model microgravity experiments show that gravity regulates cell proliferation, differentiation, and function.

Microgravity conditions can be produced by space flight or by a free fall. However, the duration of microgravity conditions produced by a free fall is usually too short to alter cell growth and differentiation. Because of limited access to space flight, many efforts have been made to establish alternative methods for

simulating microgravity on Earth, and a clinostat is considered to be a device for simulating microgravity. The 3D-clinostat is a recently developed device for generating multi-directional G force, resulting in an environment with an average of  $10^{-3}$  G [2,6]. Our previous studies demonstrated that cells cultured in a 3D-clinostat show suppression of cell differentiation [2,4,5].

Recently, animal-free techniques, such as feeder-free and serum-free methods, have been developed for ES cell culture.

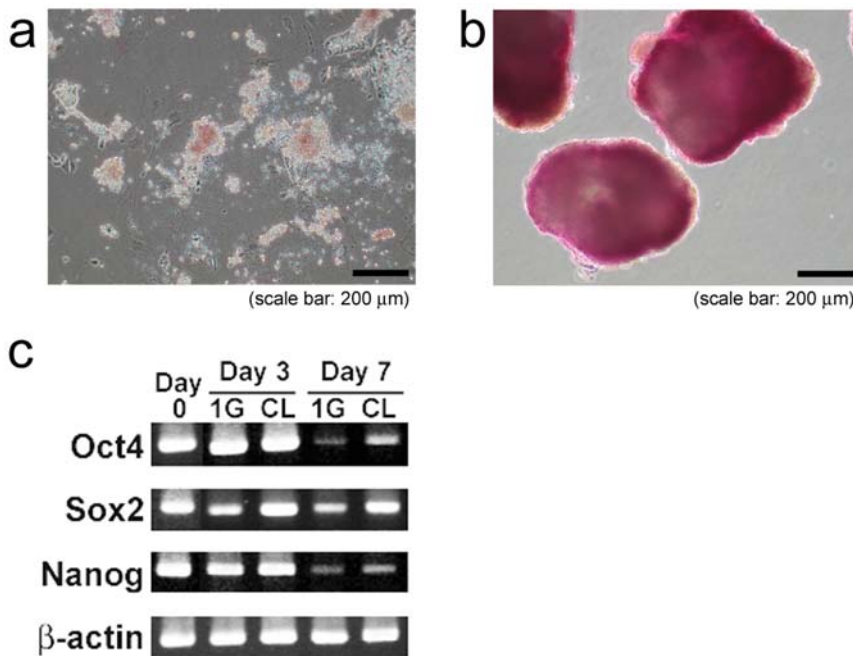

**Figure 2. ALP staining of group 1G (a) and group CL (b), on Day 7.** The cell spheres of group CL were positive for ALP. The cells of group CL expressed undifferentiated cell markers (c). doi:10.1371/journal.pone.0006343.g002

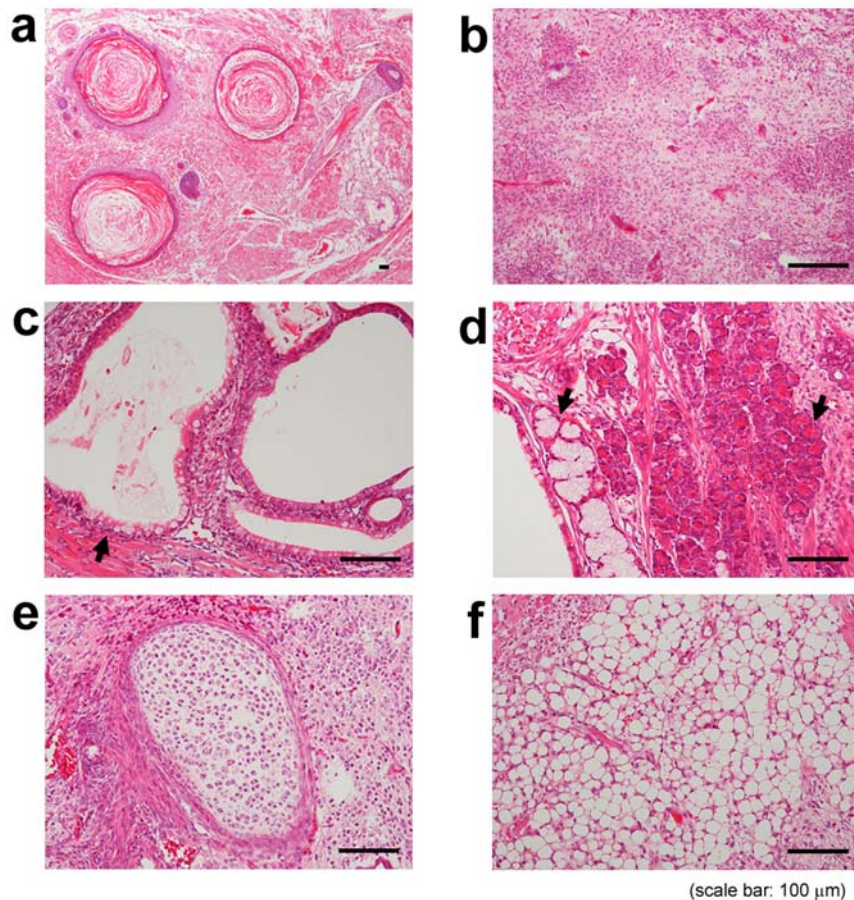

**Figure 3. H & E staining of a teratoma on Day 35 following injection.** The teratoma was generated by subcutaneously injecting cells grown in simulated microgravity for seven days. The teratoma contains a mixture of mature and immature elements derived from the ectoderm, endoderm and mesoderm in a haphazard distribution. Ectodermal derivatives include hair follicles (a) and glial tissue (b). Endodermal elements are glandular tissue (c), with a partial acinar structure (d). Mesodermal components are cartilage (e) and adipose tissue (f).  
doi:10.1371/journal.pone.0006343.g003

However, most methods have required LIF and culture vessels coated with animal derived materials, such as collagen, gelatin and complex matrix [7,8]. We successfully developed a novel LIF-free simulated microgravity culture technique for mouse ES cells. In addition, our method does not require a feeder layer, serum, coating materials or trypsin to maintain the cells. Our results suggest that simulated microgravity provides a straightforward and effective means for stem cell culture. Moreover, our results corroborate previous reports [9] suggesting that *Sox2* plays an important role during ES cell proliferation. We anticipate that this culture technique will be just as effective for human ES cell culture. Further study is needed to determine how stem cells remain undifferentiated in a simulated microgravity environment.

## Materials and Methods

### 3D-clinostat

The 3D-clinostat, a multidirectional G force generator, was produced by MITSUBISHI HEAVY INDUSTRIES, LTD. (Kobe, Japan). By employing a simultaneous rotation on two axes, the 3D-clinostat cancels the cumulative gravity vector at the center around the device, producing an environment with an average of  $10^{-3}G$  over time. This is accomplished by rotating a chamber at the center of the device to disperse the gravity vector uniformly within a spherical volume, at a constant angular velocity

(Undifferentiated pluripotent stem cell proliferation/differentiation regulation method and system, Japanese patent, publication number P2001-197182A, date of filing June. 28, 2001, and overseas patents, WO2004/061092 A1 PCT, 2004).

### Mouse ES Cells Culture

We purchased mouse ES cells (BRC6, derived from C57BL/6 mice) from the RIKEN BRC CELL BANK (Tsukuba, Japan), and cultured them with mouse embryonic fibroblasts according to a standard protocol. Then,  $1.0 \times 10^6$  mouse ES cells were seeded on OptiCell™ (Thermo Fisher Scientific Nunc brand, Rochester, NY), and cultured in normal 1G conditions (group 1G) or  $10^{-3}G$  conditions (group CL), using the 3D-clinostat (Day 0). We used feeder-free and serum-free ESF-C media (Cell Science and Technology Institute Inc., Sendai, Japan) without LIF. The culture vessels were not coated. The culture medium was not changed for seven days.

### ALP Staining

Cells were examined for ALP using an Alkaline Phosphatase Detection Kit (Millipore Co., Billerica, MA) according to the manufacturer's supplied protocol. The stained cells were examined using an inverted phase-contrast microscope (Eclipse TE 300; Nikon Co., Tokyo, Japan).



**Table 1.** Primers used for PCR and PCR conditions.

| target gene (product size) | primer sequences (sense and antisense) | PCR condition | cycles    |
|----------------------------|----------------------------------------|---------------|-----------|
| <i>Oct-4</i> (430 bp)      | 5'-CCG TGA AGT TGG AGA AGG TG -3'      |               | 30 cycles |
|                            | 5'-TGA TTG GCG ATG TGA GTG AT -3'      |               |           |
| <i>Sox2</i> (467 bp)       | 5'-AGA ACC CCA AGA TGC ACA AC -3'      | 95°C, 30 s    | 33 cycles |
|                            | 5'-CAT GTA GGT CTG CGA GCT GG -3'      | 58°C, 30 s    |           |
| <i>Nanog</i> (400 bp)      | 5'-GCA GAT GCA AGA ACC TCC TC -3'      | 68°C, 60 s    | 30 cycles |
|                            | 5'-CGT AAG GCT GCA GAA AGT CC -3'      |               |           |
| $\beta$ -actin (450 bp)    | 5'-GAG AGG GAA ATG GTG CGT GA -3'      |               | 28 cycles |
|                            | 5'-ACA TCT GCT GGA AGG TGG AC -3'      |               |           |

doi:10.1371/journal.pone.0006343.t001

## RT-PCR

Samples were collected using ISOGEN (NIPPON GENE Co., Ltd., Toyama, Japan), and RNA was isolated according to the supplied protocol. Reverse transcription was performed with ReverTra Ace  $\alpha$ - (Toyobo Co. Ltd., Osaka, Japan). Using cDNA as the template, PCR was performed using BD Advantage<sup>TM</sup> 2 PCR Kits (BD Biosciences Clontech, Palo Alto, CA). We used *Oct-4*, *Sox2*, and *Nanog* as the pluripotency markers and  $\beta$ -actin as a housekeeping gene. The sequence of the prepared primers as well as PCR conditions is shown in Table 1.

## Determination of Cell Differentiation

At Day 7 of culture, the cells of group 1G and group CL were assessed for their ability to differentiate. We subcutaneously injected  $3.0 \times 10^6$  cells in 200  $\mu$ l of PBS into a C57BL/6 mouse. After 35 days, the mice were killed and teratomas were removed, and fixed overnight in 10% formalin. Paraffin sections were used

for hematoxylin and eosin (H & E) staining, and these were examined using a multifunctional microscope (BZ-9000; KEY-ENCE Co., Osaka, Japan).

## Acknowledgments

We are grateful to Professor Wataru Yasui and Dr. Kasuhiro Sentani, from the Department of Molecular Pathology, Graduate School of Biomedical Sciences, Hiroshima University for providing suggestions. We thank Mr. Ryuji Hirose, Mr. Toshimasa Ochiai, and Mr. Eiji Matsubara, MITSUBISHI HEAVY INDUSTRIES, LTD., for providing information and suggestions. We have a patent application on the 3D-clinostat.

## Author Contributions

Conceived and designed the experiments: YK TK LY. Performed the experiments: YK TM Masaya Matsumoto TK. Analyzed the data: YK Masayasu Matsumoto LY. Contributed reagents/materials/analysis tools: LY. Wrote the paper: YK LY.

## References

- Ogawa K, Matsui H, Ohtsuka S, Niwa H (2004) A novel mechanism for regulating clonal propagation of mouse ES cells. *Genes Cells* 9: 471–477.
- Yuge L, Hide I, Kumagai T, Kumei Y, Takeda S, et al. (2003) Cell differentiation and p38(MAPK) cascade are inhibited in human osteoblasts cultured in a 3D-clinostat. *In Vitro Cell Dev Biol-Animal* 39: 89–97.
- Plett PA, Abonour R, Frankovitz SM, Orschell CM (2004) Impact of modeled microgravity on migration, differentiation, and cell cycle control of primitive human hematopoietic progenitor cells. *Exp Hematol* 32: 773–781.
- Yuge L, Kajiume T, Tahara H, Kawahara Y, Umeda C, et al. (2006) Microgravity potentiates stem cell proliferation while sustaining the capability of differentiation. *Stem Cells Dev* 15: 921–929.
- Hirasaka K, Nikawa T, Yuge L, Ishihara I, Higashibata A, et al. (2005) Clinorotation prevents differentiation of rat myoblastic L6 cells in association with reduced NF-kappa B-signaling. *BBA-Mol Cell Res* 1743: 130–140.
- Ichigi J, Asashima M (2001) Dome formation and tubule morphogenesis by *Xenopus* kidney A6 cell cultures exposed to microgravity simulated with a 3D-clinostat and to hypergravity. *In Vitro Cell Dev Biol Anim* 37: 31–44.
- Hayashi Y, Furue MK, Okamoto T, Ohnuma K, Myoishi Y, et al. (2007) Integrins regulate mouse embryonic stem cell self-renewal. *Stem Cells* 25: 3005–3015.
- Draper JS, Moore HD, Ruban LN, Gokhale PJ, Andrews PW (2004) Culture and characterization of human embryonic stem cells. *Stem Cells Dev* 13: 325–336.
- Masui S, Nakatake Y, Toyooka Y, Shimosato D, Yagi R, et al. (2007) Pluripotency governed by Sox2 via regulation of Oct3/4 expression in mouse embryonic stem cells. *Nat Cell Biol* 9: 625–635.
